# Supplementary material
Source: publisher site journal article supplement (https://www.dovepress.com/article/450061)
Supplement: Supplementary file 1 [file get_supplementary_file.php]

**Supplementary materials**

**Table S1.** Clinical characteristics of study participants according to quartiles of FIB-4.

| Variables | FIB-4 | | | | *P* value |
| --- | --- | --- | --- | --- | --- |
| First quartile, n = 145 | Second quartile, n =145 | Third quartile, n =144 | Fourth quartile, n = 144 |
| Demographic characteristics |  |  |  |  |  |
| Age, years | 61.2 ± 10.6 | 70.5 ± 8.3 | 74.6 ± 7.7 | 76.8±9.2 | 0.001 |
| Male, n (%) | 86 (59.3) | 83 (57.2) | 85 (59.0) | 84 (58.3) | 0.985 |
| Body mass index, kg/m2 | 25.0 ± 3.1 | 24.3 ± 3.7 | 24.3 ± 4.2 | 24.7±3.6 | 0.582 |
| Vascular risk factors, n (%) |  |  |  |  |  |
| Hypertension | 97 (66.9) | 114 (78.6) | 114 (79.2) | 117 (81.3) | 0.017 |
| Diabetes mellitus | 61 (42.1) | 64 (44.1) | 70 (48.6) | 70 (48.6) | 0.595 |
| Hyperlipidemia | 11 (7.6) | 13 (9.0) | 17 (11.8) | 23 (16.0) | 0.110 |
| Coronary heart disease | 10 (6.9) | 24 (16.6) | 27 (18.8) | 36 (25.0) | 0.001 |
| Smoking  drinking | 47(32.4)  31 (21.4) | 48 (31.1)  31 (21.4) | 51 (35.4)  34 (23.6) | 57 (39.6)  34 (23.6) | 0.575  0.938 |
| Clinical data |  |  |  |  |  |
| Pre-stroke mRS | 0 (0, 0) | 0 (0, 0) | 0 (0, 0) | 0 (0, 0) | 0.119 |
| Systolic blood pressure, mmHg | 137.5 ± 22.2 | 140.0 ± 21.2 | 138.3 ± 25.3 | 137.4± 20.1 | 0.673 |
| Diastolic blood pressure, mmHg | 84.4 ± 12.5 | 85.0 ± 13.2 | 83.2 ± 14.6 | 83.0±15.0 | 0.646 |
| Baseline NIHSS, score | 8.0 (12.0, 16.0) | 10.0 (14.0, 17.5) | 11.0 (15.0, 19.0) | 12.0 (15.0, 21.0) | 0.006 |
| Baseline ASPECTS, score | 9.0 (8.0, 9.0) | 9.0 (8.0, 9.0) | 9.0 (8.0, 10.0) | 9.0 (8.0, 9.0) | 0.565 |
| Stroke subtypes, n (%) |  |  |  |  | 0.001 |
| Atherosclerotic | 90 (62.1) | 78 (53.8) | 60 (41.7) | 53 (36.9) |  |
| Cardioembolic | 27 (18.6) | 56 (38.6) | 78 (54.2) | 85 (59.0) |  |
| Others | 28 (19.3) | 11 (7.6) | 6 (4.2) | 6 (4.2) |  |
| Prior intravenous thrombolysis, n (%) | 45 (31.0) | 52 (35.9) | 55 (38.2) | 58 (40.3) | 0.398 |
| Poor collateral status, n (%) | 69 (47.6) | 72 (49.7) | 76 (52.8) | 79 (54.9) | 0.612 |
| Successful reperfusion, n (%) | 126 (86.9) | 127 (87.6) | 131 (90.1) | 130 (90.2) | 0.626 |
| sICH, n (%) | 6 (4.1) | 15 (10.3) | 21 (14.6) | 23 (16.0) | 0.006 |
| Vascular occlusion site, n (%) |  |  |  |  | 0.997 |
| Internal carotid artery | 64 (44.1) | 64 (44.1) | 63 (43.8) | 62 (43.1) |  |
| Middle cerebral artery | 81 (55.9) | 81 (55.9) | 81 (36.3) | 82(56.9) |  |
| Laboratory parameters |  |  |  |  |  |
| Fasting blood glucose, mmol/L | 7.0 ± 2.4 | 7.5 ± 2.4 | 7.2 ± 2.5 | 7.2 ± 2.4 | 0.647 |
| Hs-CRP, ug/mL | 8.4 (4.5, 16.8) | 12.3 (4.9, 32.7) | 10.0 (2.8, 27.2) | 15.0 (4.8, 38.1) | 0.328 |
| Alanine aminotransferase, IU/L | 19.6 ± 9.6 | 19.0 ± 12.3 | 16.2 ± 7.8 | 31.0 ± 12.3 | 0.007 |
| Aspartate transaminase, IU/L | 17.3 ± 5.2 | 19.8 ± 6.5 | 21.9 ± 6.9 | 34.8 ± 16.4 | 0.001 |
| Platelet count, 10^9/L | 246.5 ± 58.8 | 196.1 ± 42.5 | 172.0 ± 34.1 | 131.7 ± 38.8 | 0.001 |

Abbreviations: ASPECTS, the Alberta Stroke Program Early Computed Tomography Score; FIB-4, fibrosis-4 index; Hs-CRP, hyper-sensitive C-reactive protein; NIHSS, National Institutes of Health Stroke Scale; sICH, symptomatic intracranial hemorrhage.
